# Supplementary material for: Oxygen vacancy modulated Fe-doped Co3O4 hollow nanosheet arrays for efficient oxygen evolution reaction
Source: Royal Society of Chemistry journal article supplement (doi:10.1039/d3cc05581g), 2023-12-21
Supplement: d3cc05581g1.pdf [file d3cc05581g1.pdf]

## **Electronic Supplementary Information**

### **Experimental Section**

#### **Materials and Chemicals**

Cobalt nitrate hexahydrate (II) ( $\text{Co}(\text{NO}_3)_2 \cdot 6\text{H}_2\text{O}$ , 99%), 2-methylimidazole (2-MIM, 99%), potassium ferrocyanide ( $\text{K}_4[\text{Fe}(\text{CN})_6] \cdot 3\text{H}_2\text{O}$ , 98%), sodium borohydride ( $\text{NaBH}_4$ , 98%) and ethanol were purchased from Sinopharm Chemical Reagent Co., Ltd. The nickel foam (NF) was purchased from J&K Chemical Technology, and ultrasonic cleaned with 1M HCl (30 min), deionized (DI) water and anhydrous ethanol several times before use. Ruthenium oxide ( $\text{RuO}_2$ ), platinum (Pt/C 20 wt%) and Nafion (5%) were commercially available. All the reagents and solvents are analytical grade, and used without further purification.

#### **Synthesis of ZIF-L nanosheet arrays on NF**

Generally, 0.582 g  $\text{Co}(\text{NO}_3)_2 \cdot 6\text{H}_2\text{O}$  and 1.313 g 2-MIM were dissolved in 40 ml DI water, separately. Then, two solutions were mixed and stirred for 2 min to form a purple mixture. To which, a piece of cleaned NF (2 cm×5 cm) was immersed, and kept static for 4 h at room temperature. Afterwards, the purple ZIF-L nanosheet arrays coated NF was taken out, washed by DI water for several times and dried at 60 °C overnight.

#### **Synthesis of hollow Fe-Co PBA on NF**

Typically, 0.6 g  $\text{K}_4[\text{Fe}(\text{CN})_6]$  was dissolved in 60 ml DI water, and then the prepared ZIF-L was immersed into the solution. The Fe-Co PBA was obtained thorough an ion exchange process at room temperature for 4 h. The sample was rinsed

by DI water for several times, and dried at 60 °C overnight. For comparison, Fe-Co PBA-2h and Fe-Co PBA-6h were also prepared by the same method except adjusting the ion exchange time to 2 and 6 h, accordingly.

#### **Synthesis of hollow Fe-Co<sub>3</sub>O<sub>4</sub> and V<sub>o</sub>-Fe-Co<sub>3</sub>O<sub>4</sub> on NF**

The Fe-Co<sub>3</sub>O<sub>4</sub> was obtained by annealing the Fe-Co PBA in air at 300 °C for 2 h with a ramping rate of 10 °C min<sup>-1</sup>. The Fe-Co<sub>3</sub>O<sub>4</sub>-2h and Fe-Co<sub>3</sub>O<sub>4</sub>-6h were obtained by annealing Fe-Co PBA-2h and Fe-Co PBA-6h under the same conditions. To introduce oxygen vacancy, the Fe-Co<sub>3</sub>O<sub>4</sub> was immersed into 0.1 M NaBH<sub>4</sub> solution for 1 h. Then, the obtained sample was wash by DI water and ethanol for several times, and dried in a vacuum oven at 60 °C overnight.

#### **Synthesis of Co<sub>3</sub>O<sub>4</sub> nanosheet arrays on NF**

Co<sub>3</sub>O<sub>4</sub> nanosheet arrays were obtained by direct calcination of ZIF-L in air at 300 °C for 2 h with a ramping rate of 10 °C min<sup>-1</sup>.

#### **Preparation of Pt/C and RuO<sub>2</sub> on NF**

2 mg commercial RuO<sub>2</sub> or Pt/C powders were dispersed in 500 μL ethanol, 485 μL DI water and 15 μL Nafion, and then it was sonicated for 30 min to obtain a uniform mixture. Finally, the slurry was dripped onto the NF substrate and dried overnight to obtain Pt/C and RuO<sub>2</sub> electrodes.

## Characterization

The morphology and microstructure of the electrocatalysts were investigated by scanning electron microscopy (SEM, Nova Nano SEM 450) and transmission electron microscopy (TEM, FEI Tecnai TF20) equipped with energy dispersive X-ray spectroscopy (EDS). X-ray diffraction patterns (XRD) were collected from Bruker AXS D8 Advance X-ray diffractometer with Cu K $\alpha$  radiation ( $\lambda=1.5406$  Å). X-ray photoelectron spectroscopy (XPS) measurement was performed on a Thermo Scientific ESCA-Lab-200i-XL spectrometer. Electron paramagnetic resonance (EPR) spectra were recorded with Bruker EPR EMXPLUS 10/12 spectrometer at 100 K. Thermogravimetric analysis (TGA) was performed on NETZSCH STA 2500 with a ramping rate of 10 K min<sup>-1</sup>.

## Electrochemical measurements

CHI 760E electrochemical workstation (Shanghai Chenhua Instrument Co. Ltd.) was used to test the electrochemical performance of as-prepared electrocatalysts. All the measurements were performed by a three-electrode system using 1 M KOH electrolyte, where Hg/HgO and Pt wire were used reference and counter electrodes, respectively. The measured potentials were referred to reversible hydrogen electrode (RHE) as follows:

$$E_{(\text{RHE})}=E_{(\text{Hg}/\text{HgO})}+0.059\times\text{pH}+0.098 \quad (\text{S1})$$

The linear sweep voltammetry (LSV) curves were recorded at a scan rate of 5 mV s<sup>-1</sup>, and the polarization curves were compensated with 90% iR. Notably, the chronopotentialmetric curves were presented without iR correction. Tafel plots of the

overpotential vs. the log (current density) were recorded with linear portions at low overpotentials according to following equation

$$\eta = a + b \log j \quad (\text{S2})$$

where  $\eta$  was the overpotential,  $b$  was the Tafel slope,  $j$  was the current density and  $a$  was the exchange current density.

Electrochemical impedance spectroscopy (EIS) measurements were carried out to obtain the charge transfer resistance ( $R_{ct}$ ) in the frequency range of 100 kHz to 0.01 Hz with an AC amplitude of 5mV.

To calculate the electrochemical surface area (ECSA) of electrocatalysts, cyclic voltammetry (CV) measurements were performed in the non-faradaic potential ranges at different scan rates to obtain the double layer capacitance ( $C_{dl}$ ). The  $C_{dl}$  and ECSA were estimated as follows:

$$C_{dl} = \Delta j / 2\nu \quad (\text{S3})$$

$$\text{ECSA} = C_{dl} / C_s \quad (\text{S4})$$

Where  $\Delta j$  was the current density difference between the anode and cathode,  $\nu$  was the scan rate and  $C_s$  was the specific capacitance. The specific capacitance for a flat surface depending on the electrode materials was found to be in a range of 20–60  $\mu\text{F cm}^{-2}$ , and here we assumed a moderate value of 40  $\mu\text{F cm}^{-2}$  for the calculations of ECSA.

Bubbling method which recording data of the rising volume  $V$  (mL) of the soap bubble and the total number of charges transferred under constant current (200 mA  $\text{cm}^{-2}$ ) was measured to calculate the Faraday efficiency (FE) as follows:<sup>1</sup>

$$FE=4 * F * V/(1000 * V_m * It) \quad (S5)$$

Where F was the Faraday constant (96485 C mol<sup>-1</sup>), V was the volume change of oxygen production (mL) and V<sub>m</sub> is the molar volume (molar under normal temperature and pressure, 24.5 L mol<sup>-1</sup>).

The TOFs (in s<sup>-1</sup>) for OER were calculated as follows:<sup>2, 3</sup>:

$$TOF = \frac{j(\eta)A}{4nF} \quad (S6)$$

where j (η) was the current density (in A cm<sup>-2</sup>) at an overpotential of η, A was the geometric testing area of electrode (in cm<sup>2</sup>), 4 represented the number of four-electrons transferred during O<sub>2</sub> production, n was the number of surface active sites (in mol), F was the Faraday constant (96485 C mol<sup>-1</sup>) and n was the moles of metal atoms on the electrode calculated from the loading weight and the molecular weight of the catalysts.

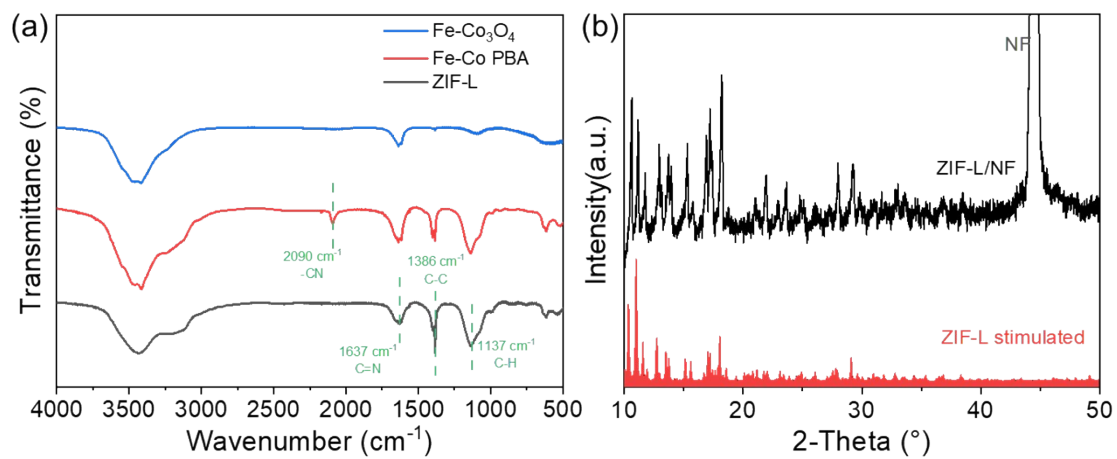

**Fig. S1** (a) FT-IR spectra of ZIF-L, Fe-Co PBA and Fe-Co<sub>3</sub>O<sub>4</sub>. (b) XRD pattern of ZIF-L/NF.

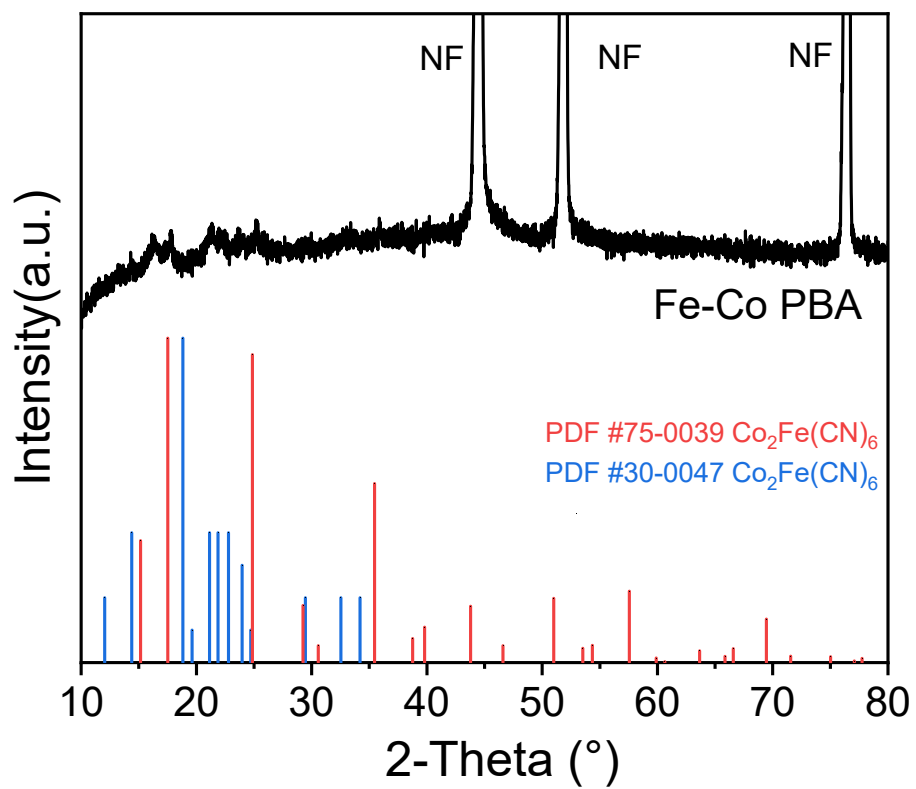

**Fig. S2** XRD pattern of Fe-Co PBA.

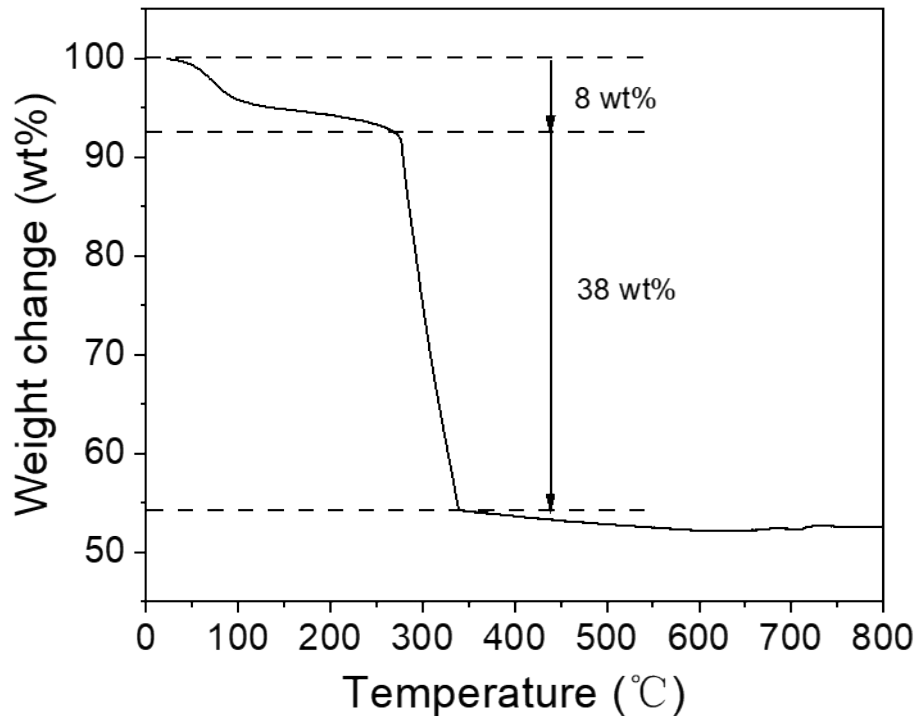

**Fig. S3** TG analysis of Fe-Co PBA in air atmosphere.

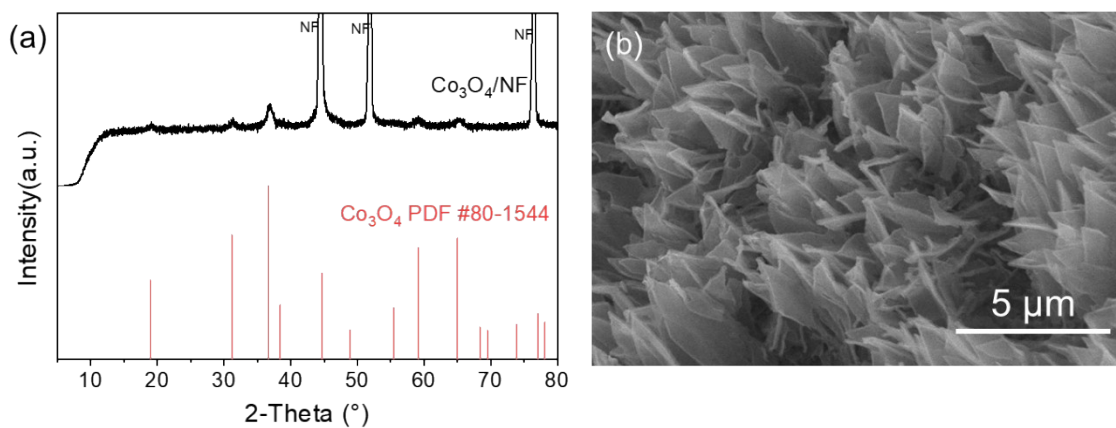

**Fig. S4** (a) XRD pattern and (b) SEM image of Co<sub>3</sub>O<sub>4</sub>/NF.

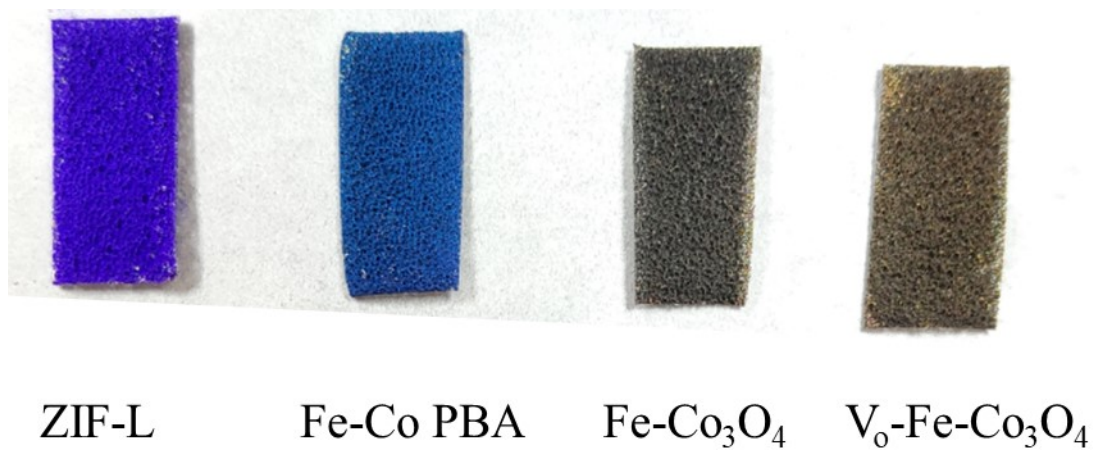

**Fig. S5** Optical photographs of the ZIF-L, Fe-Co PBA, Fe-Co<sub>3</sub>O<sub>4</sub> and V<sub>0</sub>- Fe-Co<sub>3</sub>O<sub>4</sub> growing on the nickel foam substrate.



clea

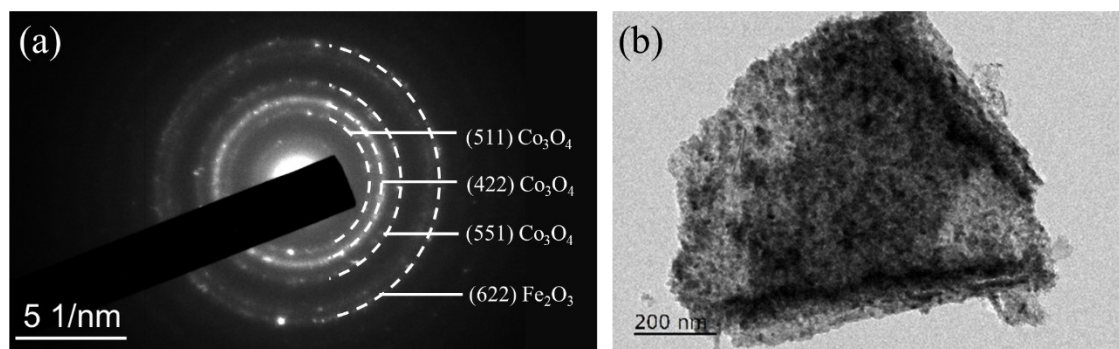

**Fig. S6** (a) SAED pattern of  $V_0\text{-Fe-Co}_3\text{O}_4$ ; (b) TEM image of  $V_0\text{-Fe-Co}_3\text{O}_4$ .

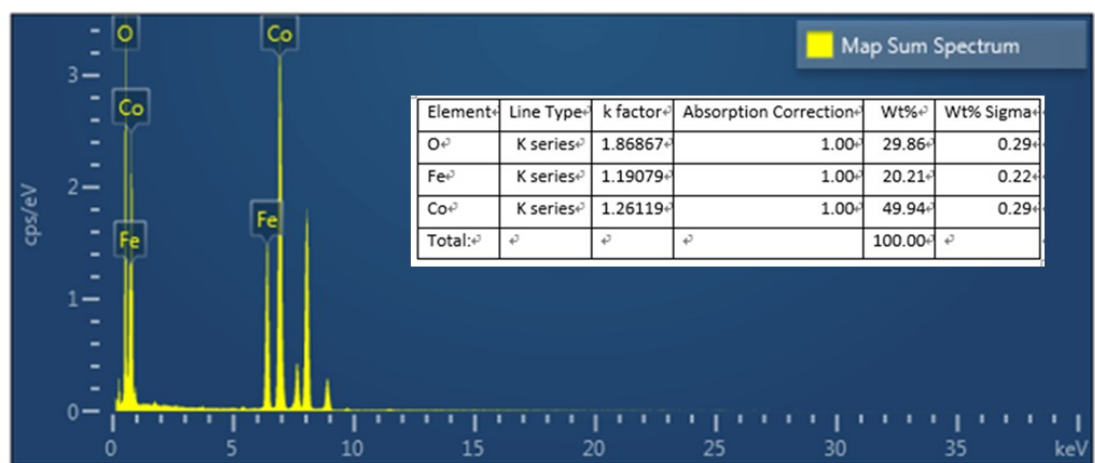

**Fig. S7** EDS pattern of  $V_0\text{-Fe-Co}_3\text{O}_4$  and corresponding compositions of the sample.

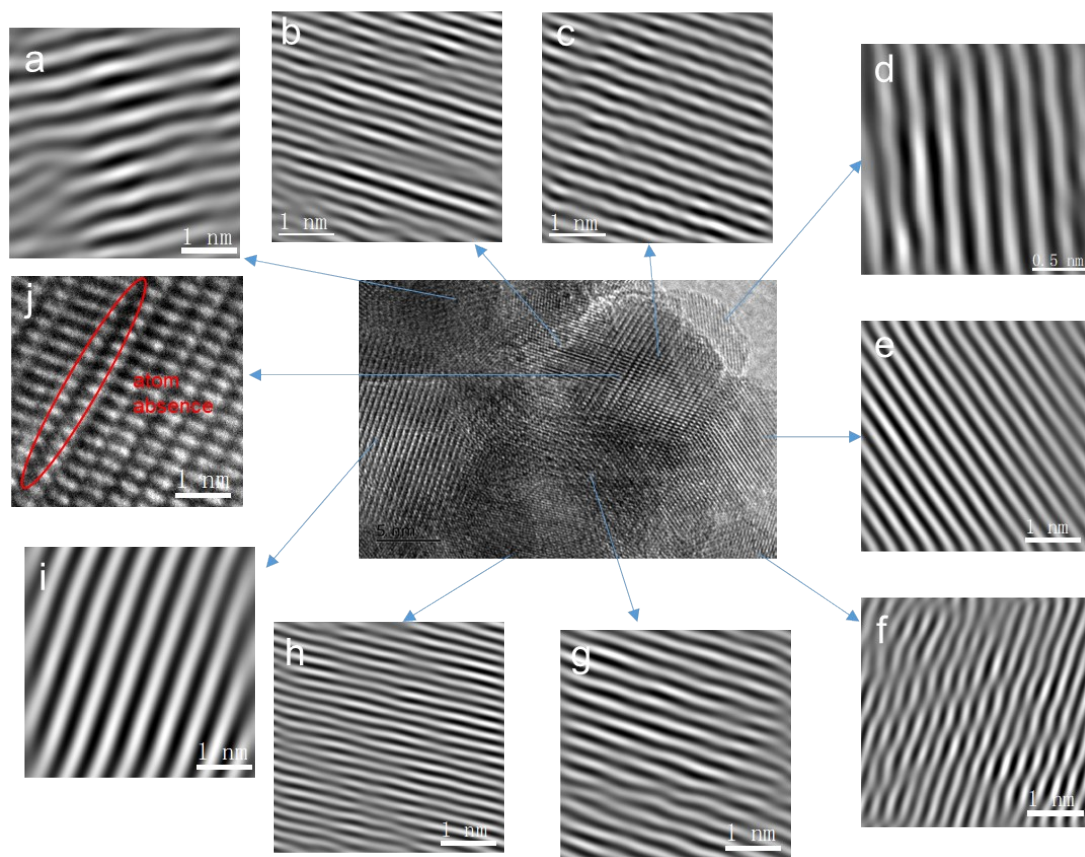

**Fig. S8** HRTEM images of  $V_0\text{-Fe-Co}_3\text{O}_4$  at different positions.

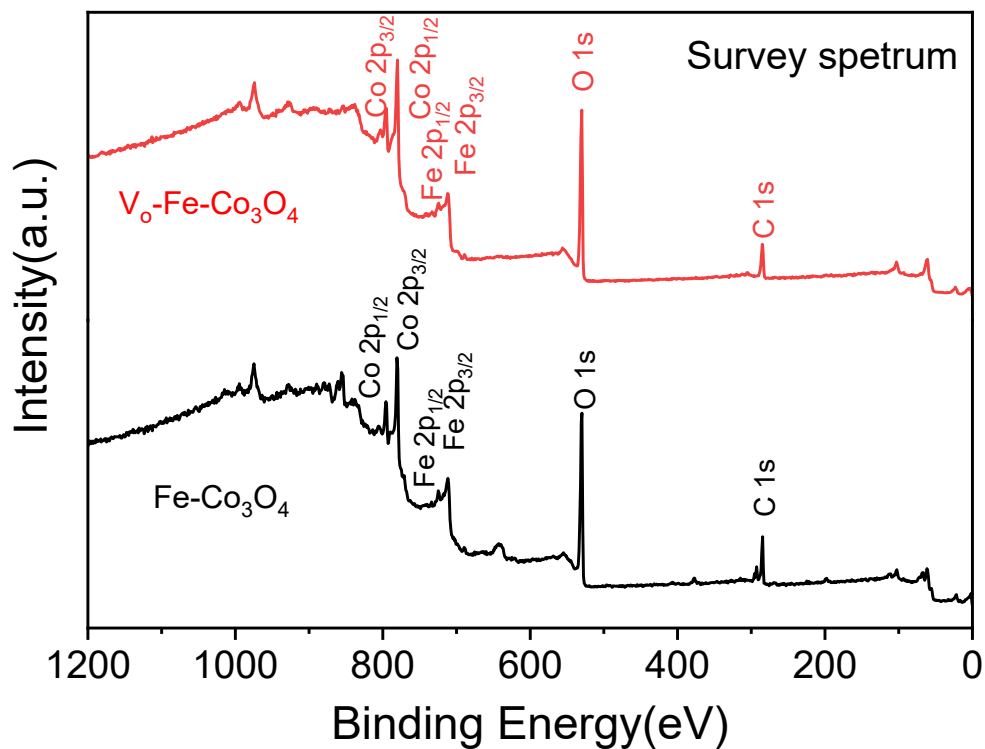

**Fig. S9** Survey spectrum of  $V_o\text{-Fe-Co}_3\text{O}_4$  and  $\text{Fe-Co}_3\text{O}_4$ .

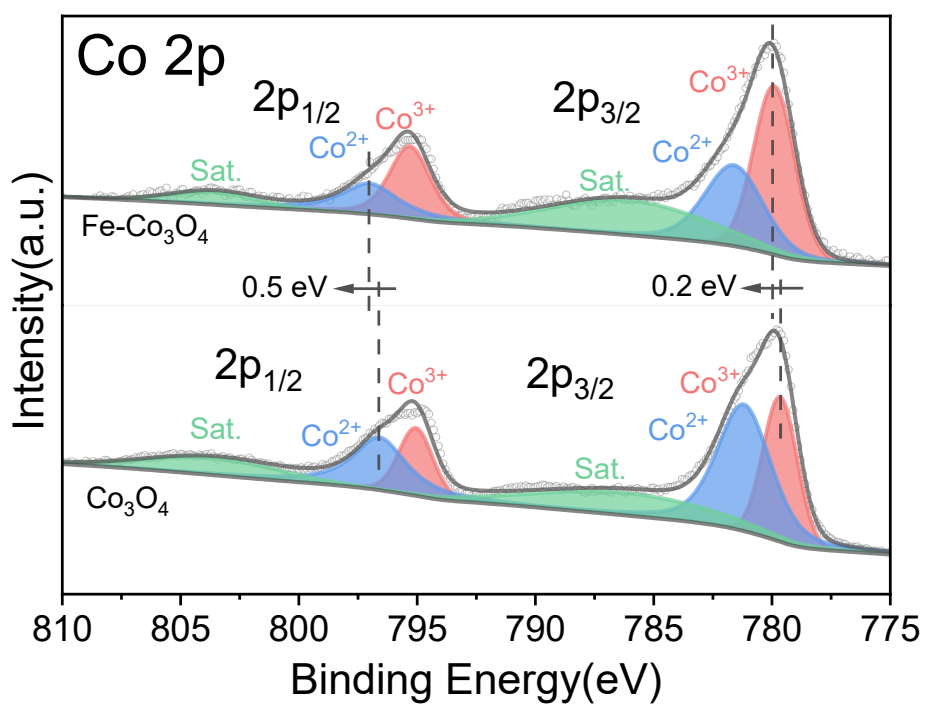

**Fig. S10** High resolution XPS spectra of  $\text{Co } 2p$  of  $\text{Fe-Co}_3\text{O}_4$  and  $\text{Co}_3\text{O}_4$ .

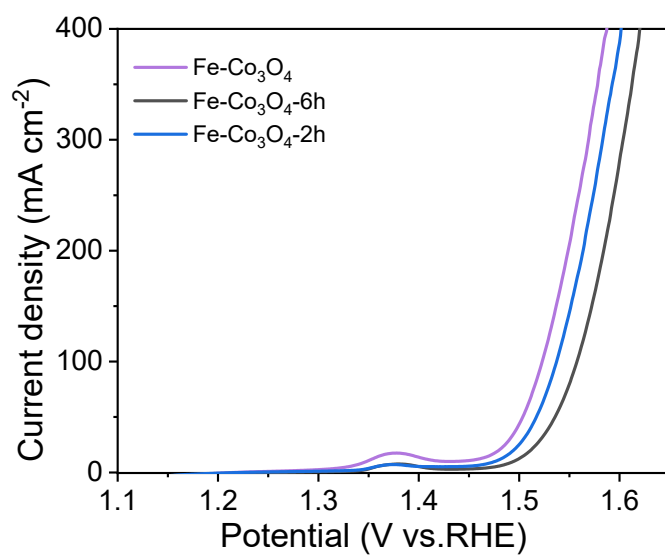

**Fig. S11** OER polarization curves of the samples prepared with different ion exchange times.

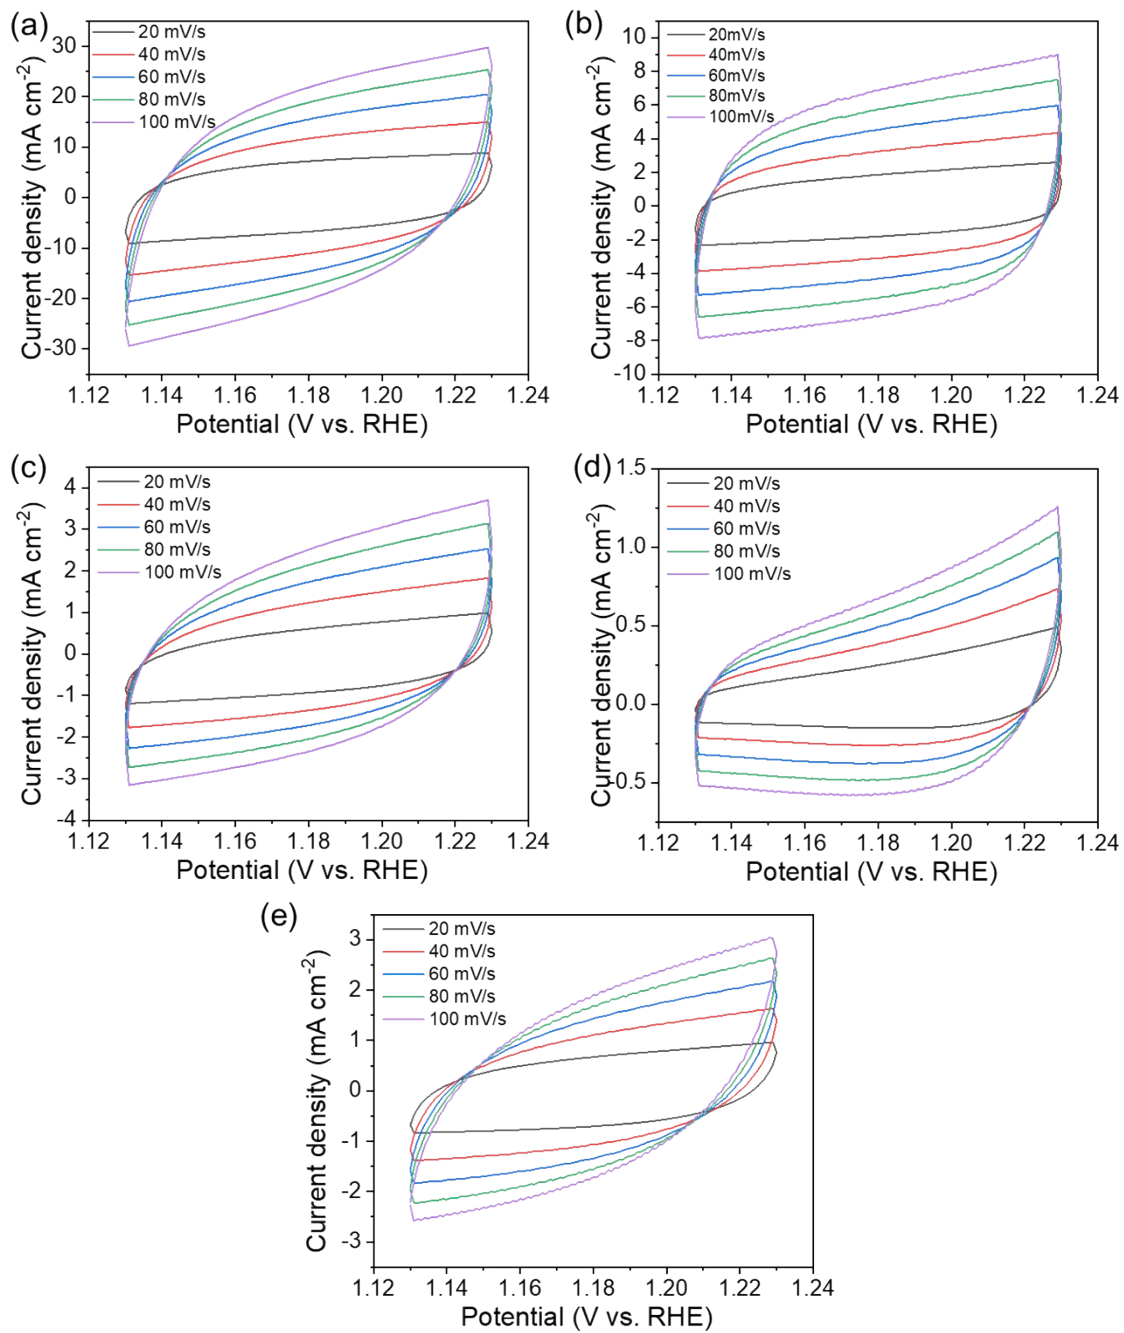

**Fig. S12** CV curves of (a)  $V_0$ -Fe- $Co_3O_4$ , (b) Fe- $Co_3O_4$ , (c)  $Co_3O_4$ , (d) NF and (e)  $RuO_2$  in the non-faradaic regions.

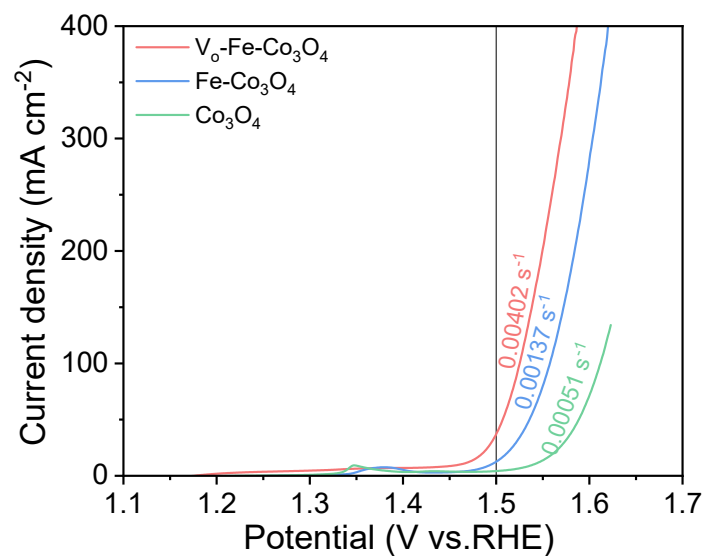

**Fig. S13** TOF values of  $V_0\text{-Fe-Co}_3\text{O}_4$ ,  $\text{Fe-Co}_3\text{O}_4$  and  $\text{Co}_3\text{O}_4$  at the overpotential of 270 mV.

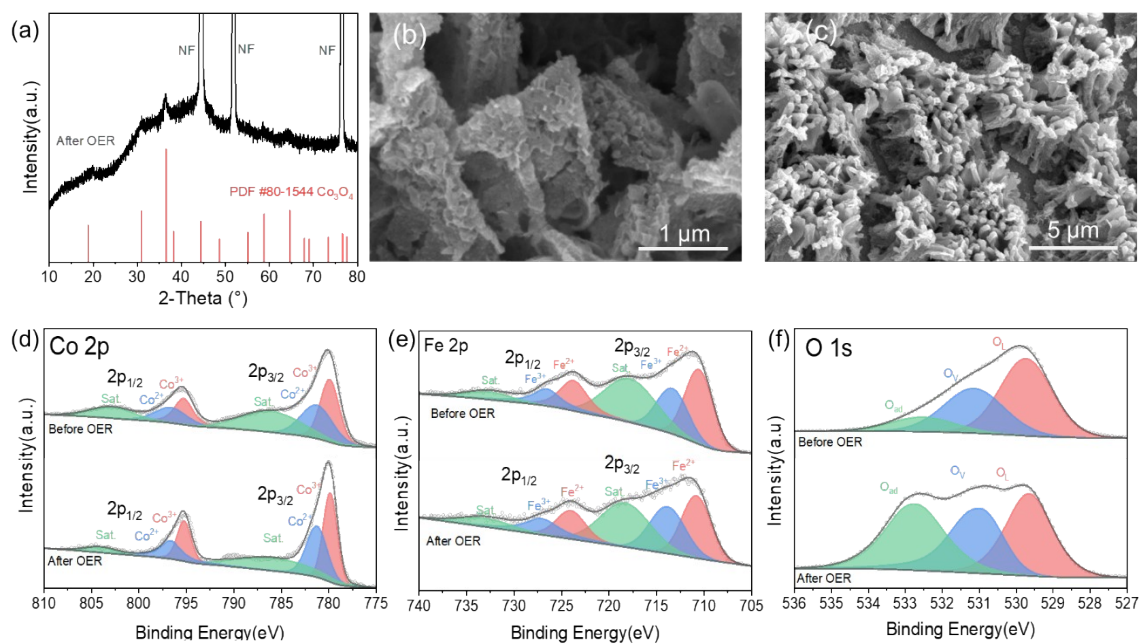

**Fig. S14** (a) XRD pattern and (b, c) SEM images of  $V_0\text{-Fe-Co}_3\text{O}_4$  after 50 h CP test toward OER. High resolution XPS spectra of (d) Co 2p, (e) Fe 2p and (f) O 1s of  $V_0\text{-Fe-Co}_3\text{O}_4$  before and after 50 h CP test toward OER.

**Table S1** EIS results of V<sub>o</sub>-Fe-Co<sub>3</sub>O<sub>4</sub>, Fe-Co<sub>3</sub>O<sub>4</sub>, Co<sub>3</sub>O<sub>4</sub>, NF and RuO<sub>2</sub>.

|                     | V <sub>o</sub> -Fe-Co <sub>3</sub> O <sub>4</sub> | Fe-Co <sub>3</sub> O <sub>4</sub> | Co <sub>3</sub> O <sub>4</sub> | NF    | RuO <sub>2</sub> |
|---------------------|---------------------------------------------------|-----------------------------------|--------------------------------|-------|------------------|
| R <sub>s</sub> (Ω)  | 1.18                                              | 1.17                              | 1.52                           | 1.29  | 1.23             |
| R <sub>ct</sub> (Ω) | 2.30                                              | 3.60                              | 6.98                           | 10.01 | 3.69             |

**Table S2** Comparison of various catalysts for OER in 1 M KOH electrolyte.

| Catalysts                                                        | $\eta_{10}$<br>(mV) | Tafel slope<br>(mV dec <sup>-1</sup> ) | Reference        |
|------------------------------------------------------------------|---------------------|----------------------------------------|------------------|
| B-CoO/Co@NC/NF                                                   | 307                 | 65.2                                   | 4                |
| Co <sub>2</sub> P-Co <sub>3</sub> O <sub>4</sub> /C              | 246                 | 69.5                                   | 5                |
| NiCoO <sub>x</sub> -CN                                           | 326                 | 70.8                                   | 6                |
| Zn-doped Co <sub>3</sub> O <sub>4</sub>                          | 370                 | 63                                     | 7                |
| Fe <sub>2</sub> O <sub>3</sub> /ZnCo <sub>2</sub> O <sub>4</sub> | 261                 | 71.8                                   | 8                |
| Ru/Co <sub>3</sub> O <sub>4-x</sub>                              | 280                 | 86.9                                   | 9                |
| Fe-Co <sub>3</sub> O <sub>4</sub> NS/CC                          | 290                 | 67.9                                   | 10               |
| CoSe <sub>2</sub> /FeSe <sub>2</sub> DS-HNCs                     | 240                 | 44                                     | 11               |
| Fe <sub>x</sub> Co <sub>3-x</sub> O <sub>4</sub> /NF             | 327( $\eta_{20}$ )  | 57                                     | 12               |
| (Ni,Fe) <sub>2</sub> P/C HNRs                                    | 258                 | 45.5                                   | 13               |
| Fe-CoSe PA                                                       | 285                 | 68                                     | 1                |
| Fe-CoP HTPAs                                                     | 230                 | 43                                     | 14               |
| hollow Fe-CoP prism                                              | 236                 | 32.9                                   | 15               |
| Co <sub>3</sub> O <sub>4</sub> /Co-Fe oxide DSNBs                | 297                 | 61                                     | 16               |
| <b>V<sub>o</sub>-Fe-Co<sub>3</sub>O<sub>4</sub></b>              | <b>223</b>          | <b>57.4</b>                            | <b>This work</b> |



## Reference

1. J. Li, Q. He, Y. Lin, L. Han and K. Tao, *Inorganic Chemistry*, 2022, **61**, 19031.
2. C. Wang and L. Qi, *Angewandte Chemie International Edition*, 2020, **59**, 17219.
3. H. Yang, H. Sun, X. Fan, X. Wang, Q. Yang and X. Lai, *Materials Chemistry Frontiers*, 2021, **5**, 259.
4. D. C. Cha, T. I. Singh, A. Maibam, T. H. Kim, D. H. Nam, R. Babarao and S. Lee, *Small*, 2023, **19**, 2301405.
5. G. Huang, M. Hu, X. Xu, A. A. Alothman, M. S. S. Mushab, S. Ma, P. K. Shen, J. Zhu and Y. Yamauchi, *Small Structures*, 2023, **4**, 2200235.
6. X. Wang, Y. Dai, P. Wang and D. Yue, *International Journal of Hydrogen Energy*, 2023, DOI: 10.1016/j.ijhydene.2023.07.292, 0360-3199.
7. Y. Yang, L. Xu, W. Wang, R. Han, J. Ma, M. Yao, S. Geng and F. Liu, *Journal of Materials Science*, 2023, **58**, 5234.
8. S. Fu, Y. Ma, X. Yang, X. Yao, Z. Jiao, L. Cheng and P. Zhao, *Applied Catalysis B: Environmental*, 2023, **333**, 122813.
9. C.-Z. Yuan, S. Wang, K. San Hui, K. Wang, J. Li, H. Gao, C. Zha, X. Zhang, D. A. Dinh, X.-L. Wu, Z. Tang, J. Wan, Z. Shao and K. N. Hui, *ACS Catalysis*, 2023, **13**, 2462.
10. Y. Li, W. Zhu, X. Fu, Y. Zhang, Z. Wei, Y. Ma, T. Yue, J. Sun and J. Wang, *Inorganic Chemistry*, 2019, **58**, 6231.
11. C. Xu, Q. Li, J. Shen, Z. Yuan, J. Ning, Y. Zhong, Z. Zhang and Y. Hu, *Nanoscale*, 2019, **11**, 10738.
12. T. I. Singh, G. Rajeshkhanna, S. B. Singh, T. Kshetri, N. H. Kim and J. H. Lee, *ChemSusChem*, 2019, **12**, 4810.
13. S. K. Ramesh, J. Son, V. Ganesan and J. Kim, *Nanoscale*, 2022, **14**, 16262.
14. E. Hu, J. Ning, D. Zhao, C. Xu, Y. Lin, Y. Zhong, Z. Zhang, Y. Wang and Y. Hu, *Small*, 2018, **14**, 1704233.
15. X. Ding, H. Huang, Q. Wan, X. Guan, Y. Fang, S. Lin, D. Chen and Z. Xie, *Journal of Energy Chemistry*, 2021, **62**, 415.
16. X. Wang, L. Yu, B. Y. Guan, S. Song and X. W. D. Lou, *Advanced Materials*, 2018, **30**, 1801211.
